# Supplementary material for: Explainable identification and mapping of trees using UAV RGB image and deep learning
Source: Sci Rep. 2021 Jan 13;11:903. doi: 10.1038/s41598-020-79653-9 (PMC7806907; doi:10.1038/s41598-020-79653-9)
Supplement: Supplementary file 1 — Supplementary Information. [file 41598_2020_79653_MOESM1_ESM.pdf]

Supplementary Information for:

**Explainable identification and mapping of trees  
using UAV RGB image and deep learning**

Masanori Onishi <sup>1,\*</sup>, Takeshi Ise <sup>2</sup>

<sup>1</sup> Graduate School of Agriculture, Kyoto University, Kyoto, Japan

<sup>2</sup> Field Science Education and Research Centre, Kyoto University, Kyoto, Japan

\* Corresponding author: [onishi.masanori.25e@st.kyoto-u.ac.jp](mailto:onishi.masanori.25e@st.kyoto-u.ac.jp)

This file contains: Supplementary Figures S1-S3 and Tables S1–S5

Supplementary Figures

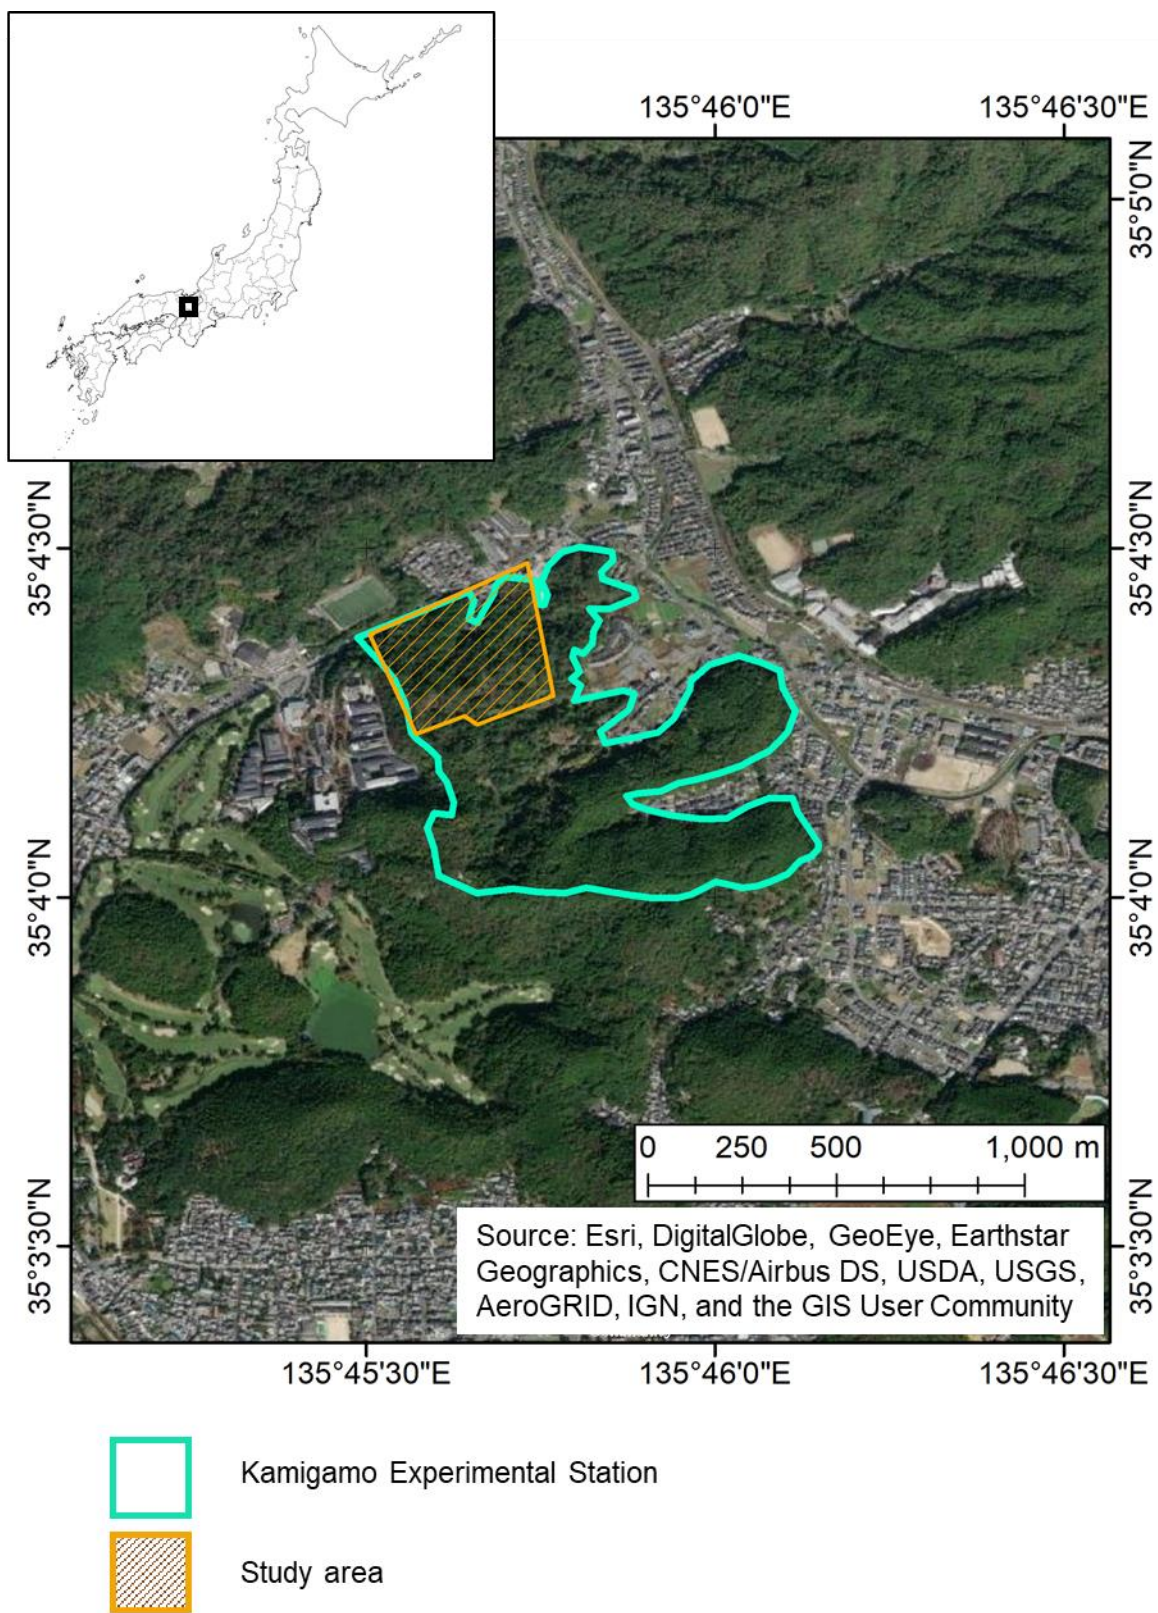

**Figure S1.** Location map of Kamigamo Experimental Station and study area. This map was created using ArcGIS Desktop v10.6 software ([www.esri.com](http://www.esri.com), Environmental Systems Research Institute, Inc., Redlands, United States).

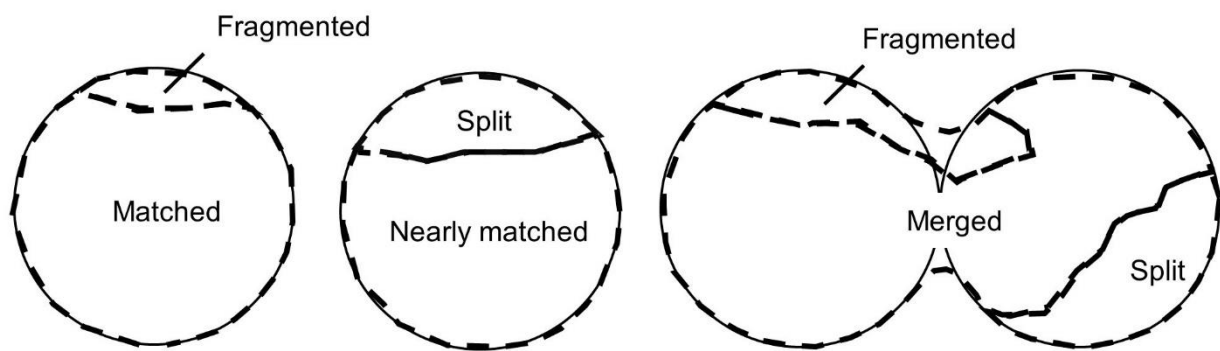

**Figure S2.** Diagram of the five categories in which segmented tree crowns were placed.

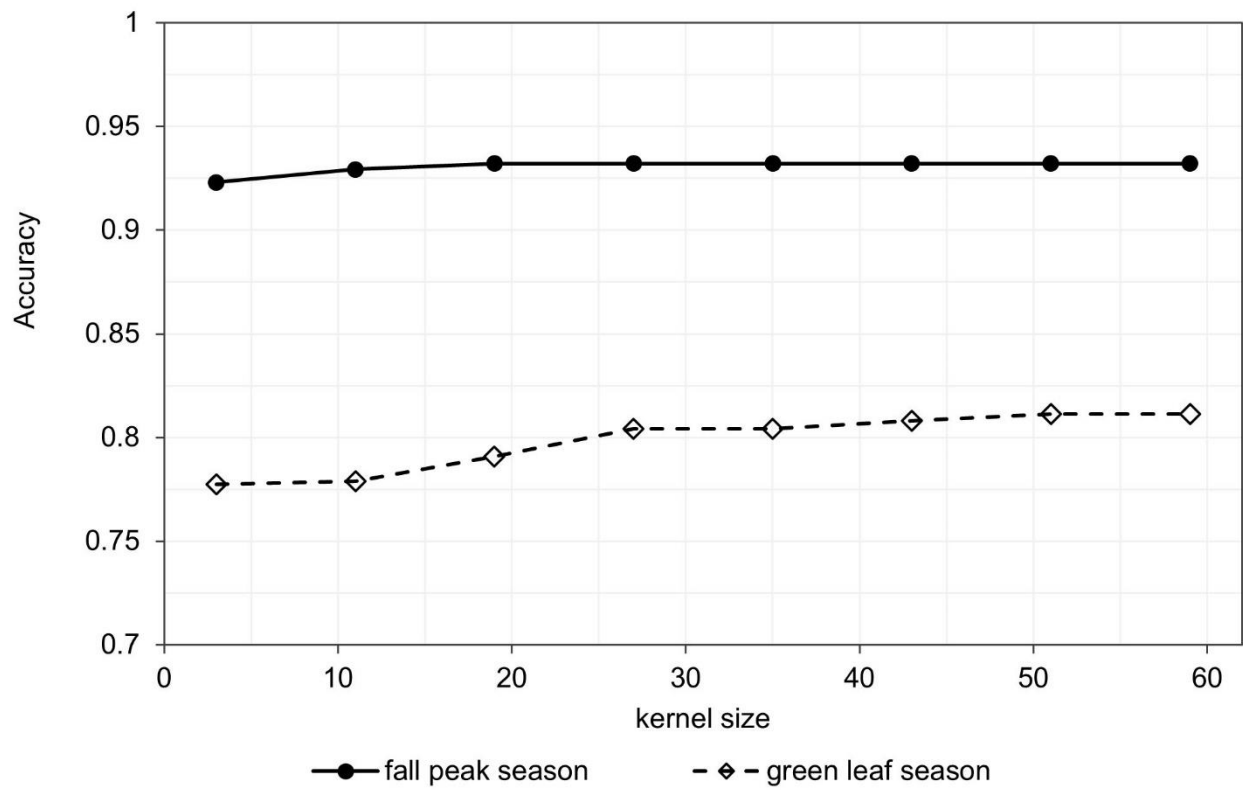

**Figure S3.** Relationship between GLCM kernel size and SVM validation accuracy in each season.

## Supplementary Tables

**Table S1.** Parameter settings for the workflow used in generating orthomosaic photo.

| Workflow                      | Parameter             | Settings   |
|-------------------------------|-----------------------|------------|
| Align Photos Build            | Accuracy              | Highest    |
|                               | Preselection          | Reference  |
|                               | Key Point Limit       | 80,000     |
|                               | Tie Point Limit       | 8,000      |
|                               | Adaptive Camera Model | Yes        |
| Build Dense Cloud             | Fitting               |            |
|                               | Quality               | High       |
|                               | Depth Filtering       | Aggressive |
| Build Digital Elevation Model | Projection            | JGD2011    |
|                               | Source                | Dense      |
|                               | Data                  | Cloud      |
|                               | Interpolation         | Enabled    |
|                               | Resolution            | 0.093 m    |
| Build Orthomosaic             | Surface               | DEM        |
|                               | Enable Hole Filling   | Yes        |
|                               | Resolution            | 0.047 m    |

**Table S2.** Parameters for multiresolution segmentation.

| Setting                       | Selected option |
|-------------------------------|-----------------|
| Weight of R, G, B, DSM, Slope | 1, 1, 1, 2, 3   |
| Scale                         | 200             |
| Compactness                   | 0.5             |
| Shape                         | 0.2             |

**Table S3.** Number of images in each class. (These are the values for one dataset).

| Class | Extracted | Arranged | Training | Augmented<br>training | Validation | Test |
|-------|-----------|----------|----------|-----------------------|------------|------|
| 1     | 418       | 315      | 174      | 1392                  | 70         | 71   |
| 2     | 87        | 60       | 33       | 264                   | 11         | 16   |
| 3     | 218       | 73       | 28       | 224                   | 24         | 21   |
| 4     | 758       | 333      | 184      | 1472                  | 65         | 84   |
| 5     | 276       | 166      | 94       | 752                   | 38         | 34   |
| 6     | 129       | 37       | 18       | 144                   | 6          | 13   |
| 7     | 1439      | 416      | 207      | 1656                  | 110        | 99   |

**Table S4.** Settings of the PyTorch image classification model.

| Setting            | Selected option |
|--------------------|-----------------|
| Training epochs    | 50–100          |
| Batch size         | 16–64           |
| Solver type        | SGD             |
| Base learning rate | 0.1–0.001       |
| Momentum           | 0.90            |

**Table S5.** Classification results of neural networks in fall peak season and green leaf season.

| CNN<br>model | Fall peak season |       |          | Green leaf season |       |          |
|--------------|------------------|-------|----------|-------------------|-------|----------|
|              | Overall          | Kappa | F1 score | Overall           | Kappa | F1 score |
| AlexNet      | 0.960            | 0.949 | 0.930    | 0.902             | 0.875 | 0.836    |
| VGG 16       | 0.973            | 0.965 | 0.958    | 0.925             | 0.903 | 0.878    |
| Resnet 18    | 0.972            | 0.964 | 0.954    | 0.919             | 0.897 | 0.876    |
| Resnet 152   | 0.976            | 0.970 | 0.962    | 0.933             | 0.914 | 0.901    |
